# Supplementary material
Source: PubMed Central journal article supplement (PMC5473222)
Supplement: 10.1074_M116.771816_jbc.M116.771816-1.pdf [file 10.1074_M116.771816_jbc.M116.771816-1.pdf]

Supplemental Fig. 1.

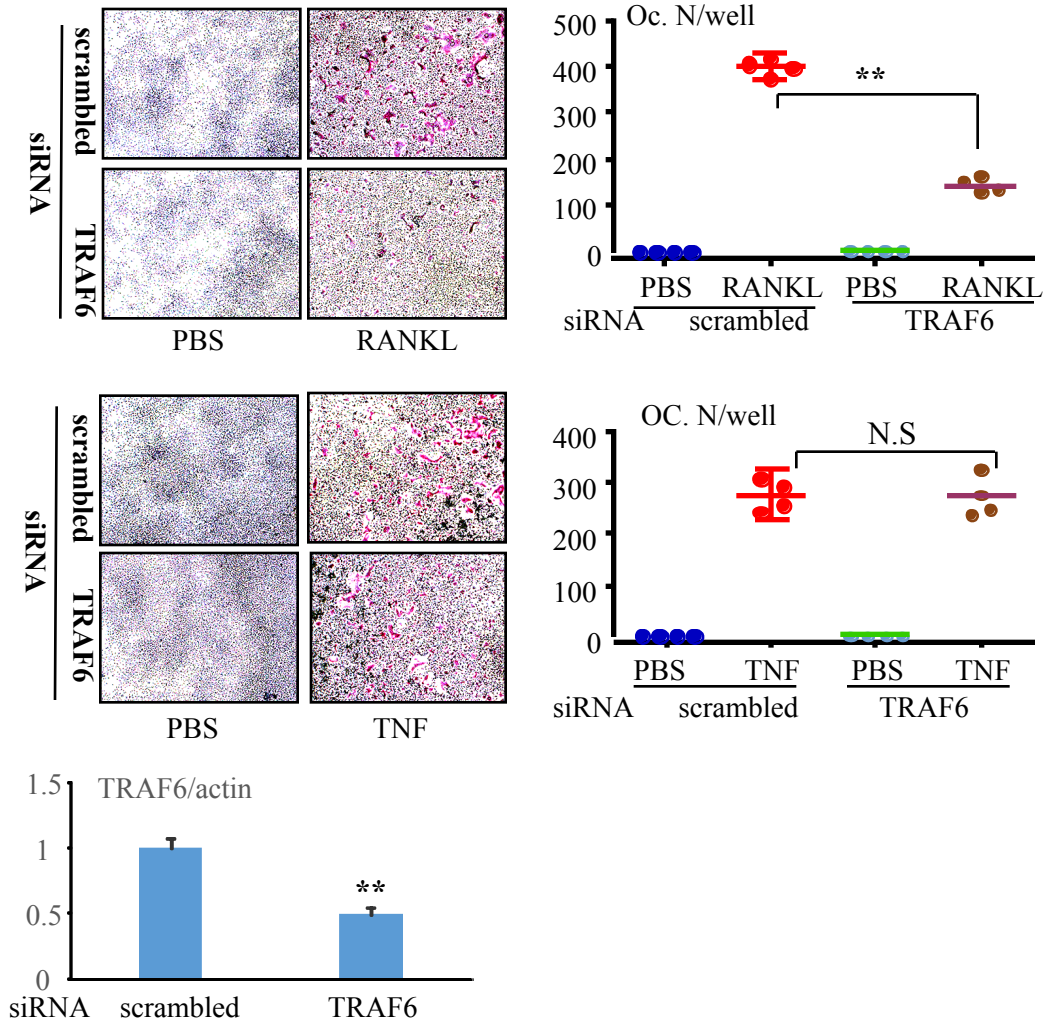

**Supplemental Fig. 1. TRAF6 siRNA inhibits RANKL-, but not TNF-induced OC formation.**

1-m-old WT mouse BM cells were cultured with M-CSF for 2 days to recruit macrophages, which were then transfected with scrambled or TRAF6 siRNA for 1 day followed by PBS and RANKL treatment for 2 additional days (upper panel) or PBS and TNF for 3 additional days (middle panel). The cells were stained for TRAP activity to count OC numbers. Total RNA was extracted from scrambled- or TRAF6 siRNA-transfected cells for 48 hrs and TRAF6 mRNA expression was tested by real-time PCR (lower panel). \* $p < 0.05$  and \*\* $p < 0.01$  vs. scrambled siRNA.

Supplemental Fig 2.

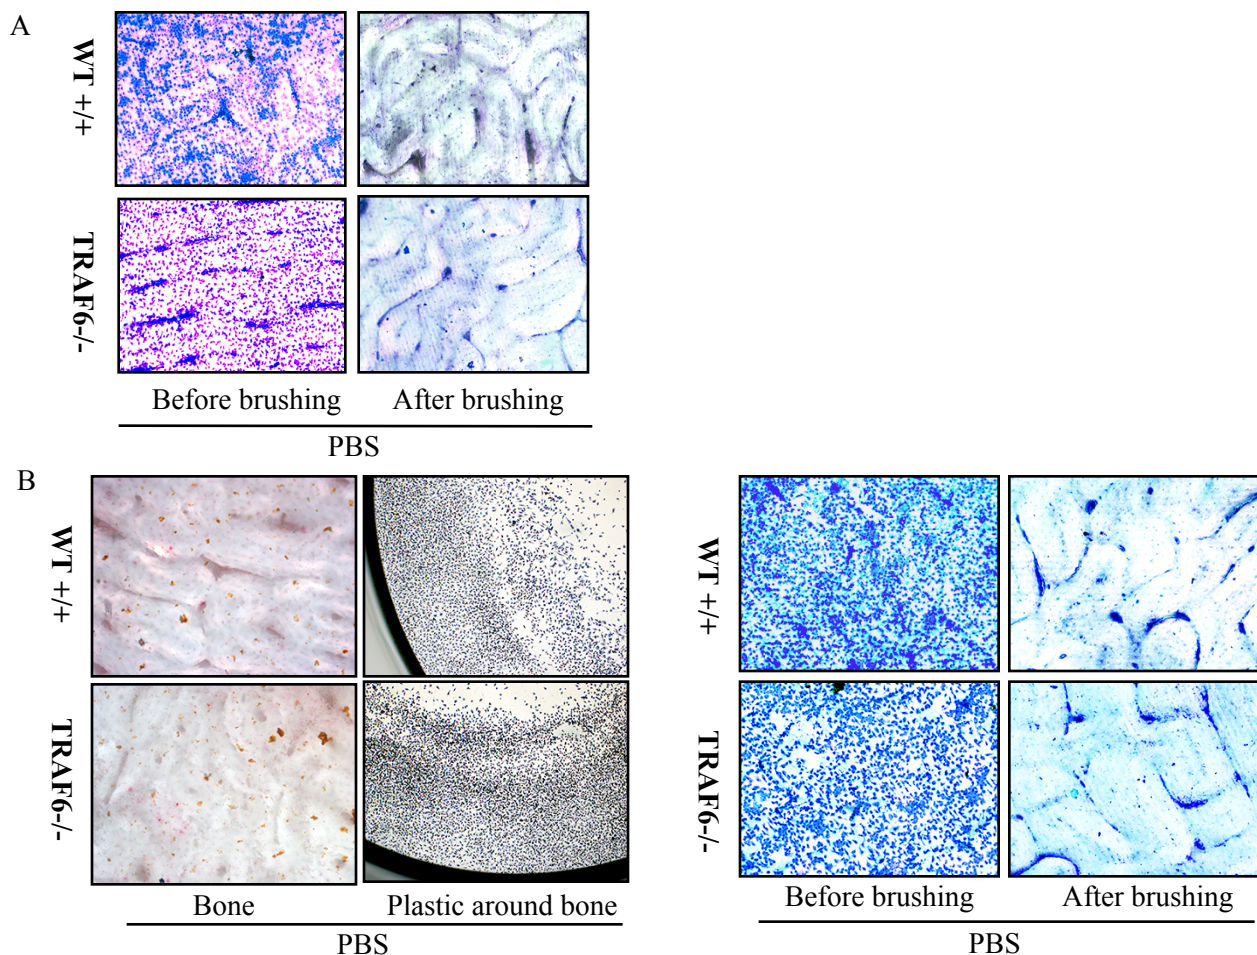

**Supplemental Fig. 2. Spleen cells treated with M-CSF alone do not undergo OC differentiation or resorb bone.** (A) WT and TRAF6<sup>-/-</sup> spleen cells were cultured on bone slices in the presence of M-CSF and treated with PBS, as a control for Fig.1C. Toluidine blue staining shows the cells on bone slices before brushing and no resorption pits after brushing. (B) WT and TRAF6<sup>-/-</sup> mouse spleen cells were cultured on bone slices in 96-well plates in the presence of M-CSF, as in Fig.2, but treated with PBS. TRAP staining of bone slices and the plastic around bone slices (left panel); Toluidine blue staining of the bone slices to show the cells before brushing and no resorption pits after brushing (right panel).

Supplemental Fig.3A.

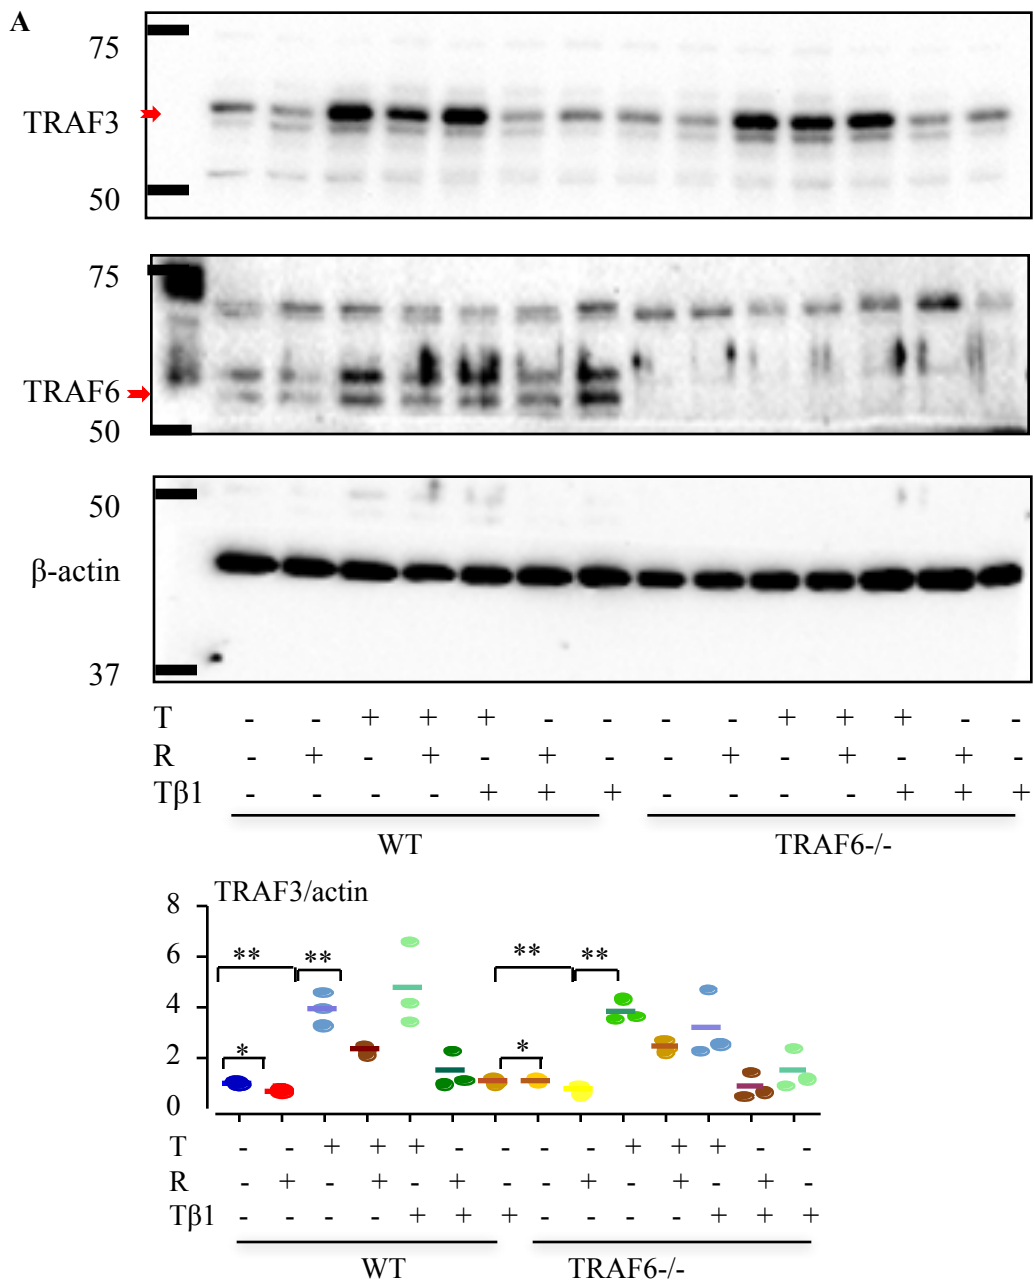

**Supplemental Fig. 3. (A)** Full images of representative Western blots from Fig.4A and densitometry data from 3 repeats. \* $p < 0.05$  and \*\* $p < 0.01$ .

**Supplemental Fig. 3B.**

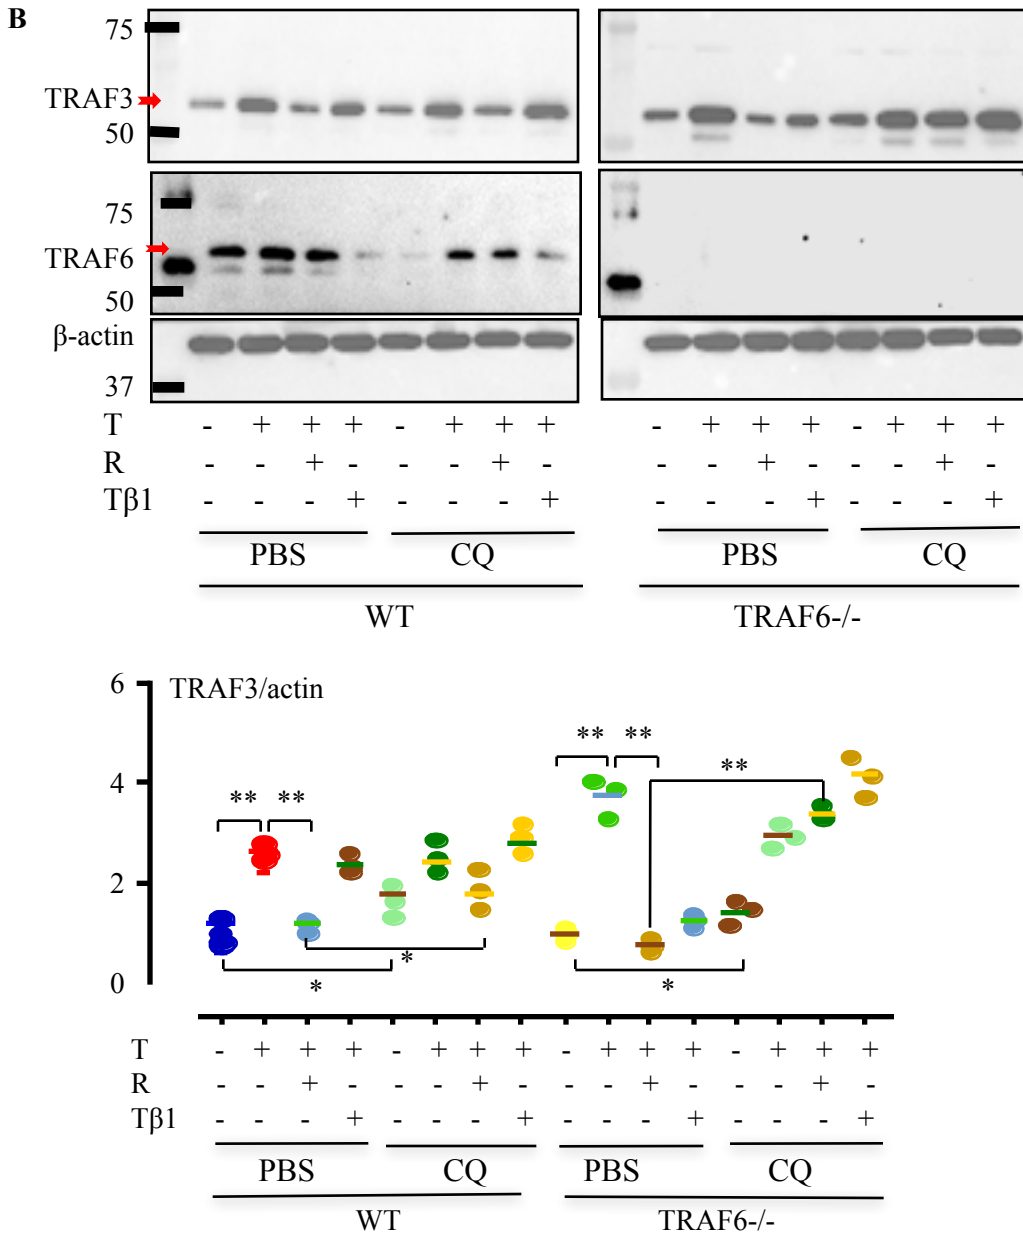

**Supplemental Fig. 3. (B)** Full images of representative Western blots from Fig.4B and densitometry data from 3 repeats. \* $p < 0.05$  and \*\* $p < 0.01$ .

**Supplemental Fig. 4.**

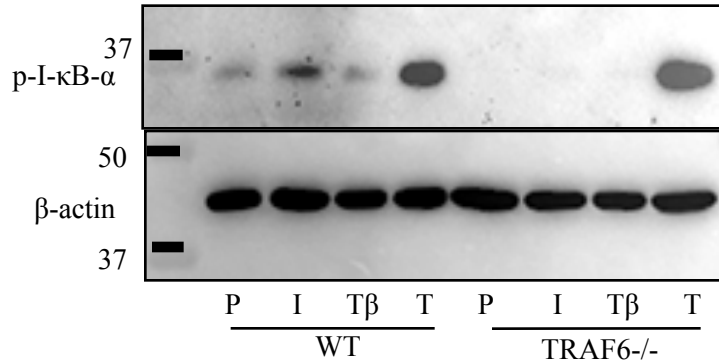

**Supplemental Fig. 4. TRAF6 is required for IL-1 $\beta$ - but not TNF-induced I- $\kappa$ B- $\alpha$  phosphorylation.** 8-d-old WT and TRAF6<sup>-/-</sup> mouse spleen cells were cultured with M-CSF for 3 d. The cells were treated with culture medium for 4 hours without FBS&M-CSF followed by treatment with PBS (P), IL-1 $\beta$  (I, 10 ng/ml), TGF $\beta$ 1 (T $\beta$ , 2 ng/ml) or TNF (T, 20 ng/ml) for 30 minutes. Cell lysates were used to test phosphorylated I- $\kappa$ B- $\alpha$  and  $\beta$ -actin.

**Supplemental Fig. 5.**

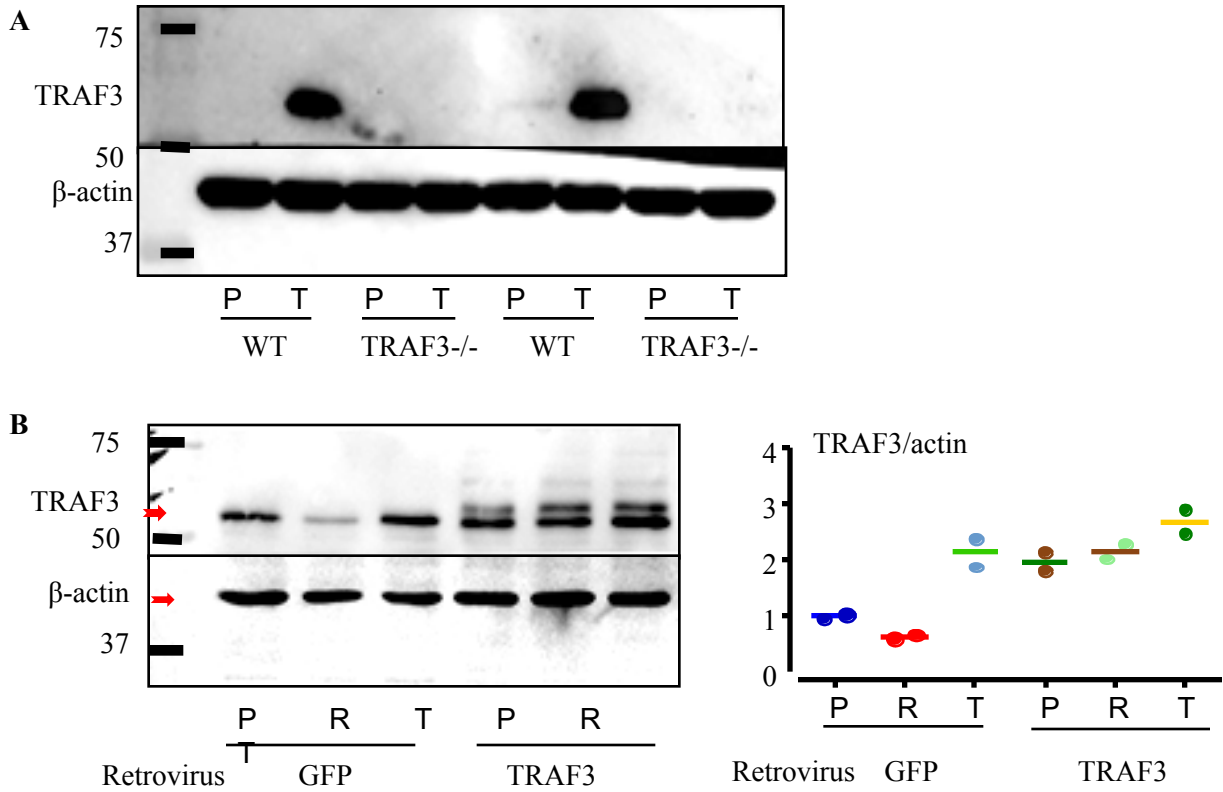

**Supplemental Fig. 5.** (A) Full images of Western blots from Fig.6A right lower panel. (B) Full images of representative Western blots from Fig.6B right lower panel and densitometry data of 2 repeats.
